# Supplementary material
Source: Research Square preprint supplement (doi:10.21203/rs.3.rs-8356239/v1)
Supplement: Supplementary file 1 [file 18ae8098cbcce0618244cd4c.docx]

Table 7 Optimization priority of gamification design elements

| Quadrant—Requirement Classification | Question number | Gamification design elements | Prioritization |
| --- | --- | --- | --- |
| Quadrant II—Must-be | 13 | Competition & Leaderboards | 1 |
| 14 | Points | 2 |
| 18 | Feedback | 3 |
| 23 | Reward redemption | 4 |
| 27 | Push notifications | 5 |
| 16 | Personal homepage | 6 |
| 28 | Email & messages | 7 |
| 12 | Onboarding tutorials | 8 |
| Quadrant I—One-dimensional | 7 | Tasks | 9 |
| 9 | Secret tasks & Exclusive rewards | 10 |
| 17 | Personal collection services | 11 |
| 19 | Badges & Achievements | 12 |
| 22 | Daily check-ins | 13 |
| Quadrant Ⅳ—Attractive | 20 | Experience & Level | 14 |
| 21 | Rewards | 15 |
| 11 | Protagonist | 16 |
| 10 | Storytelling & Contextualization | 17 |
| Quadrant III—Indifferent | 8 | Task Difficulty | 18 |
| 24 | Industry collaboration & Resource connectivity | 19 |
| 26 | Fans | 20 |
| 25 | Cultural communication forum | 21 |
| 29 | Public interaction | 22 |
| 15 | Popular resources | 23 |
