# Supplementary material
Source: Research Square preprint supplement (doi:10.21203/rs.3.rs-8356239/v1)
Supplement: Supplementary file 2 [file 535a20bbf5c9528b927c81cb.docx]

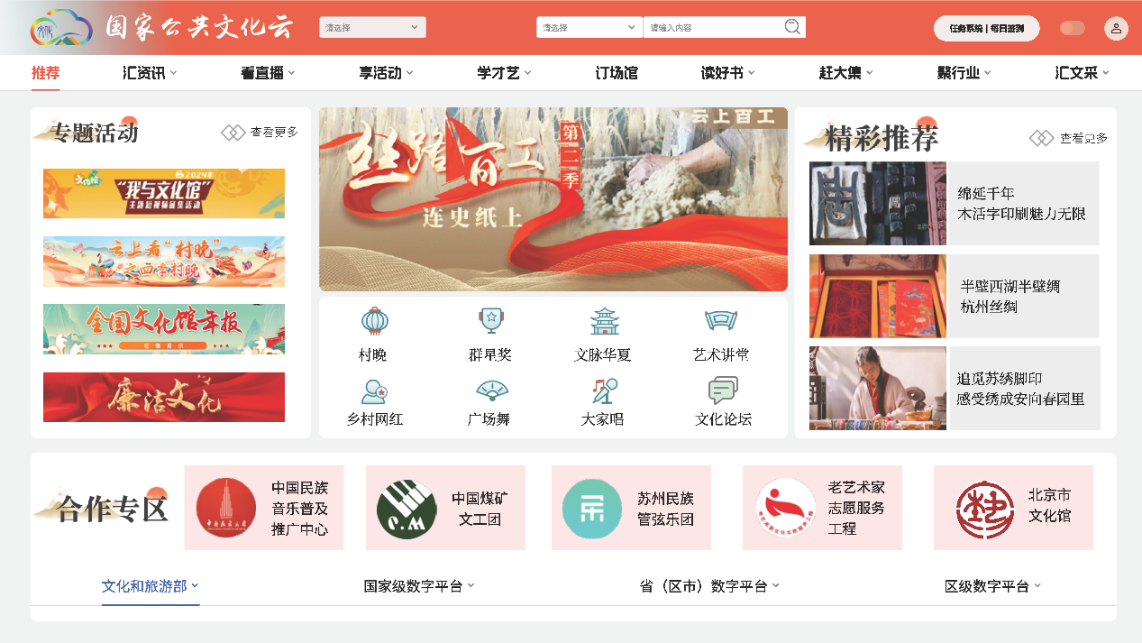


Fig. 4 National Public Culture Cloud homepage

**
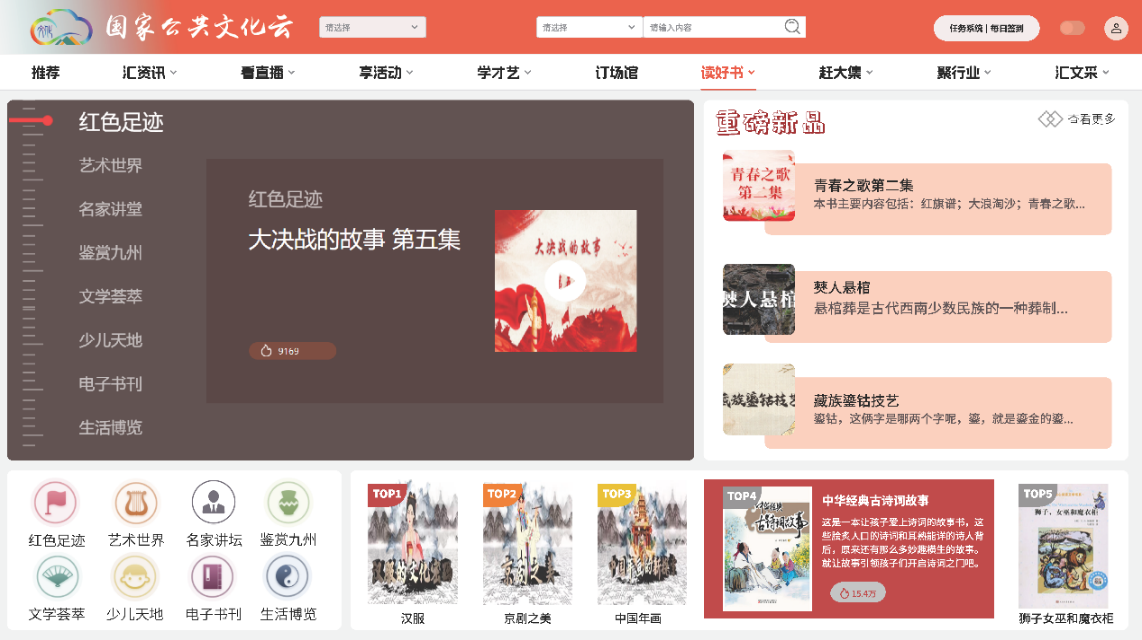
**

Fig.5 "Reading Books" section

**
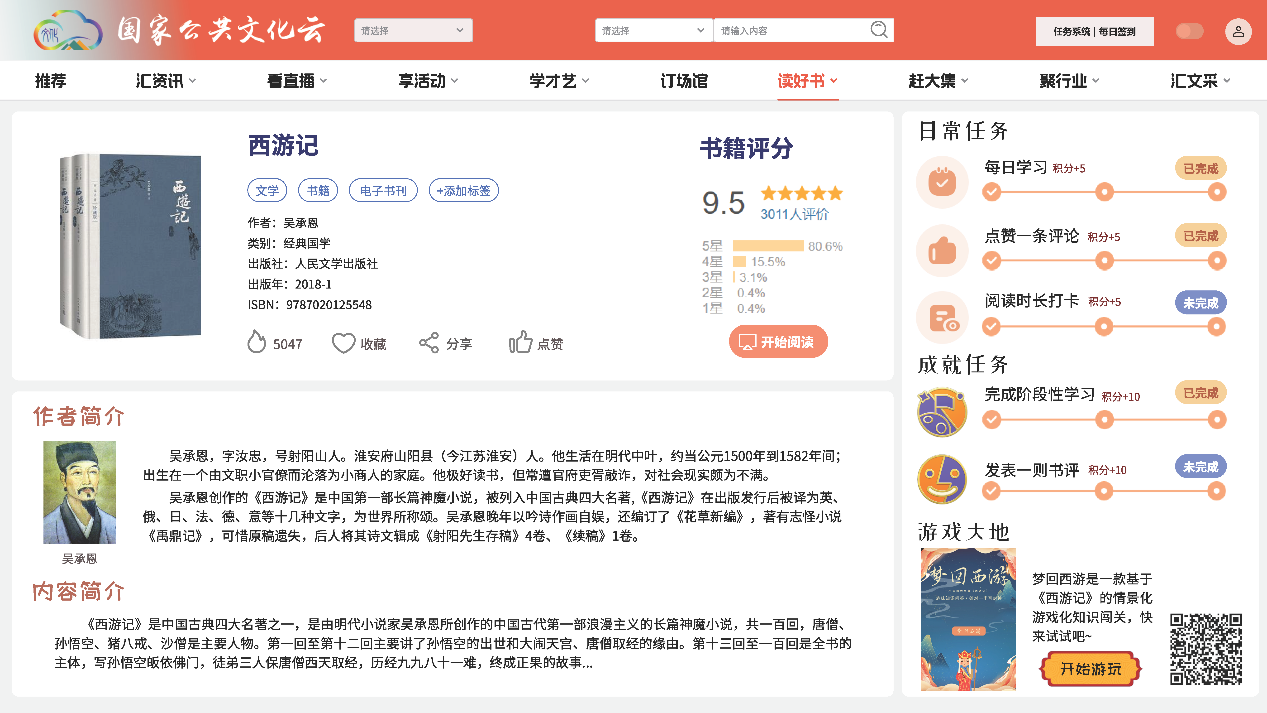
**

Fig.6 Gamification of "Reading Books" - *Journey to the West*


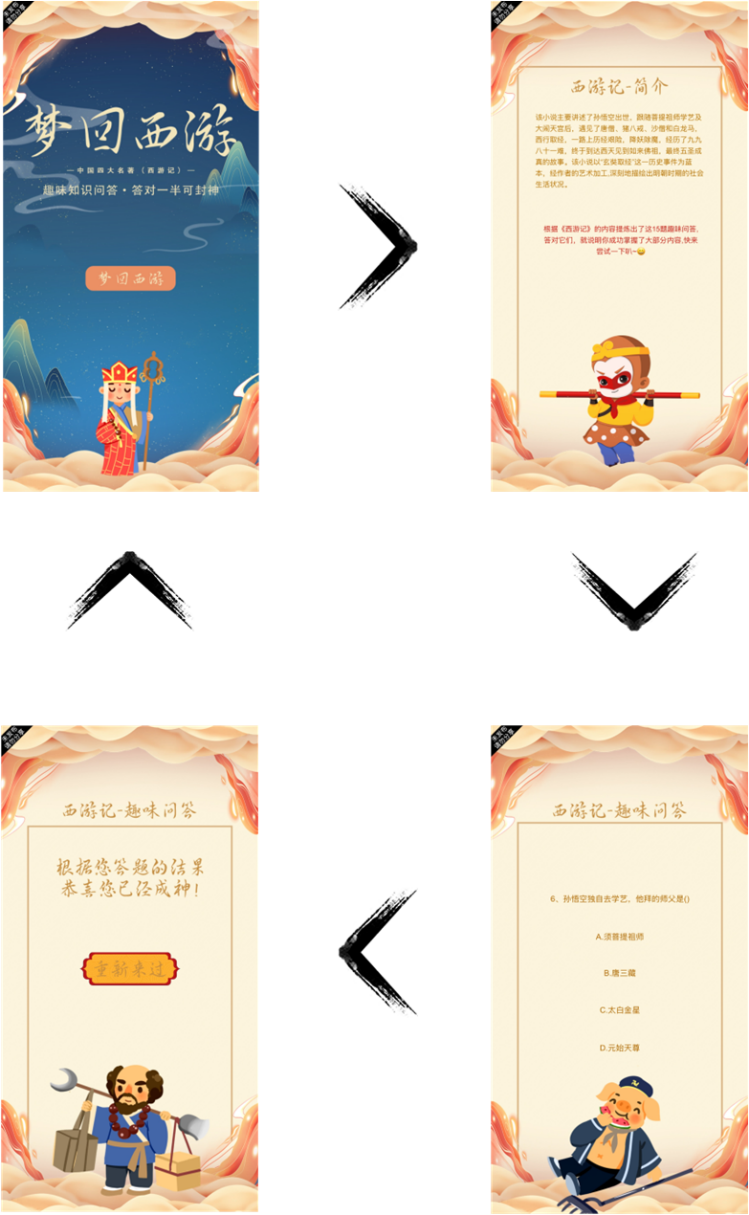


Fig.7 *Dreaming of Journey to the West* game process

**
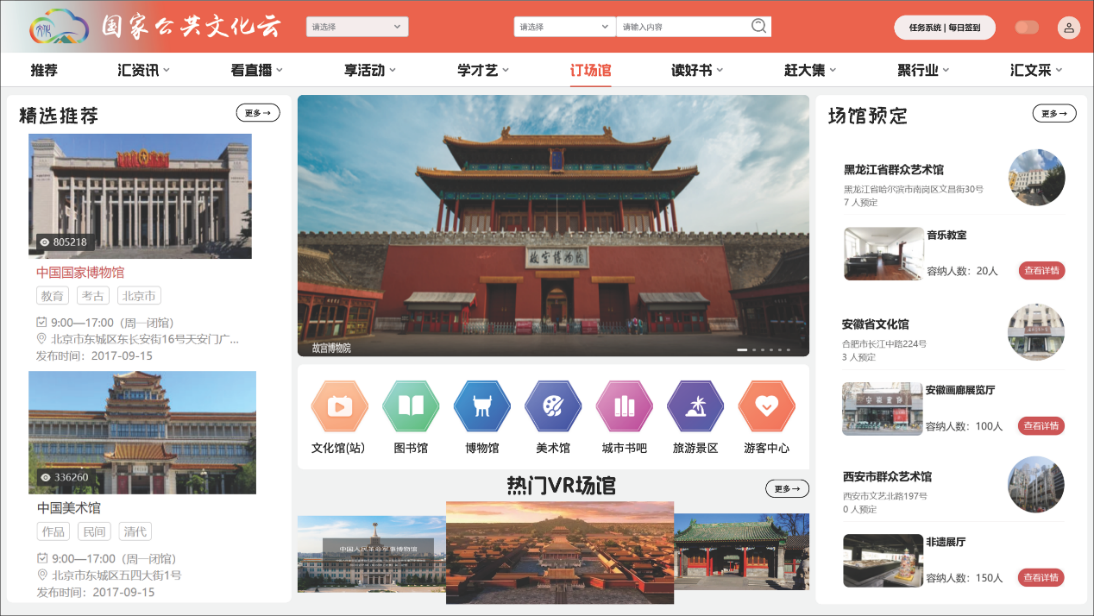
**

Fig.8 "Booking Venues" section

**
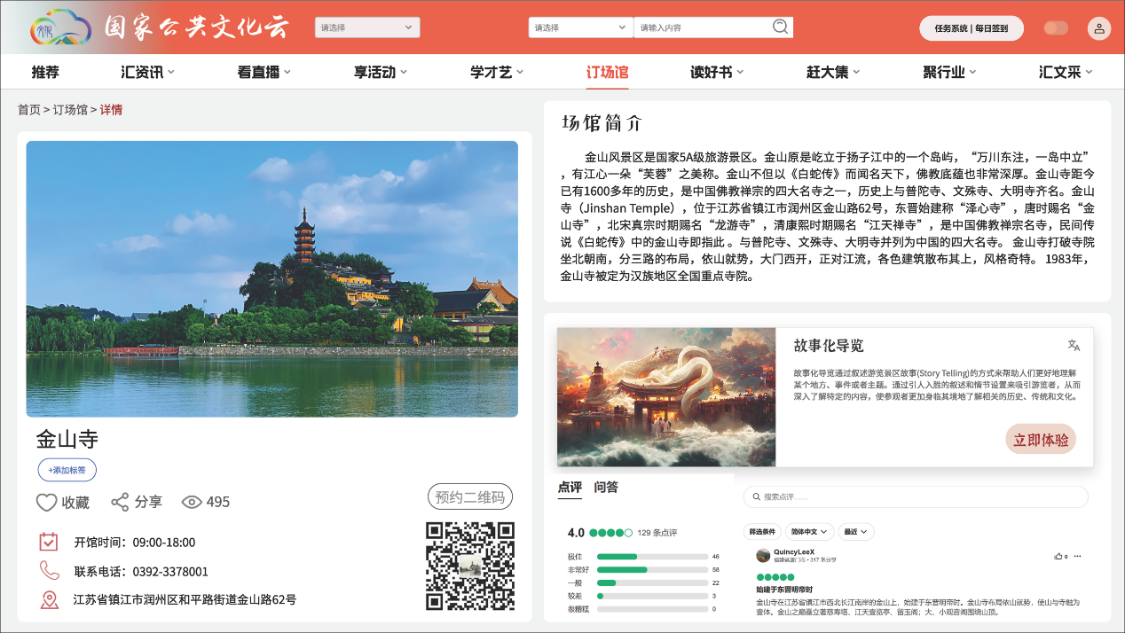
**

Fig.9 Gamification of "Booking Venues" - Jinshan Temple

**
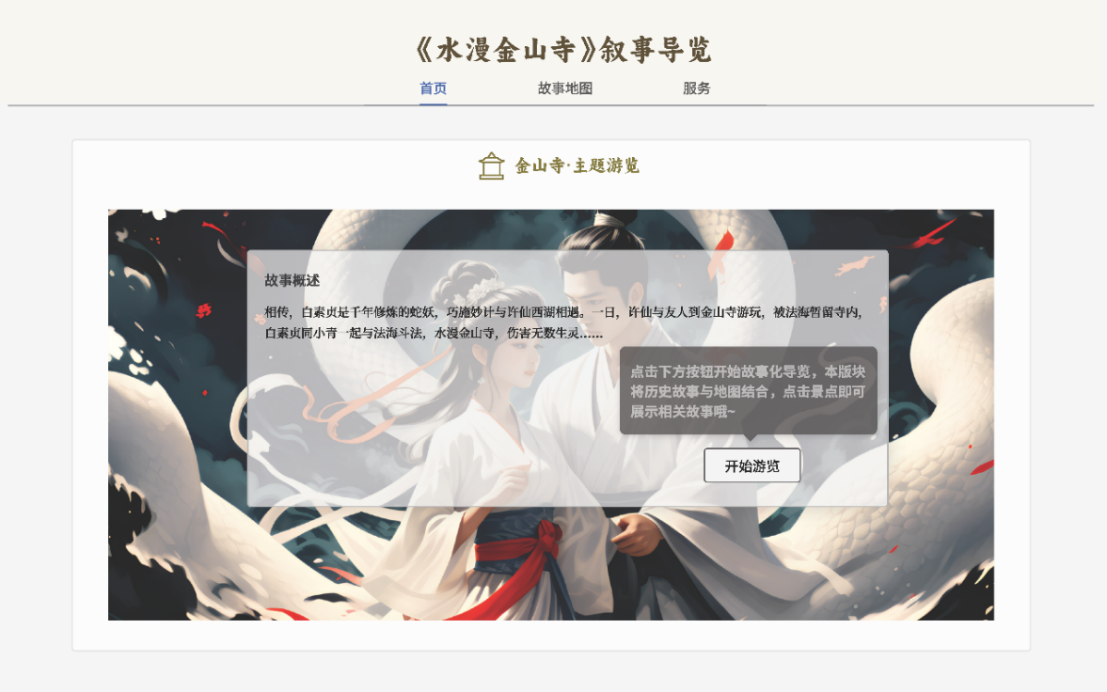
**

Fig.10 Storytelling Guide Homepage

**
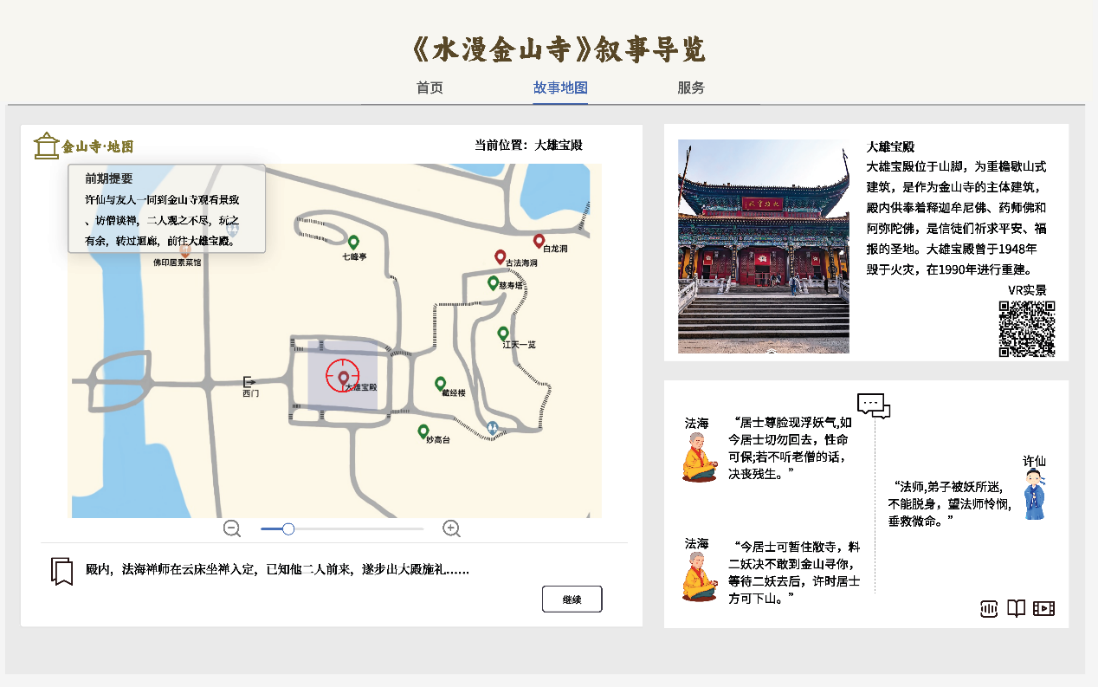
**

Fig.11 Storytelling Guide of Jinshan Temple


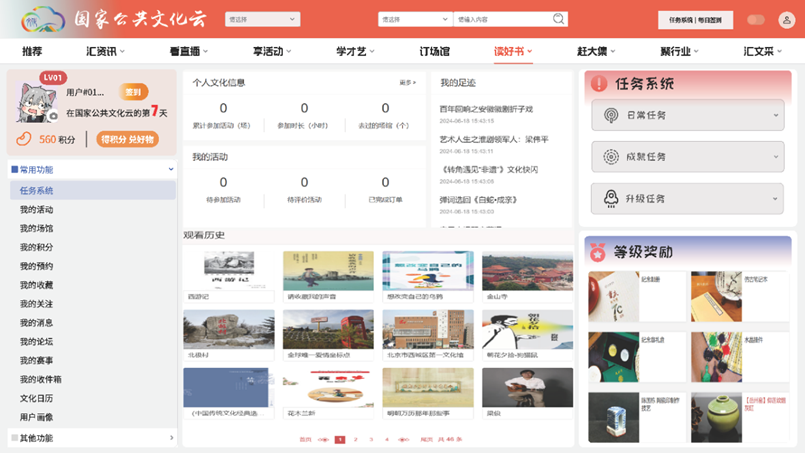


Fig.12 Personal Homepage


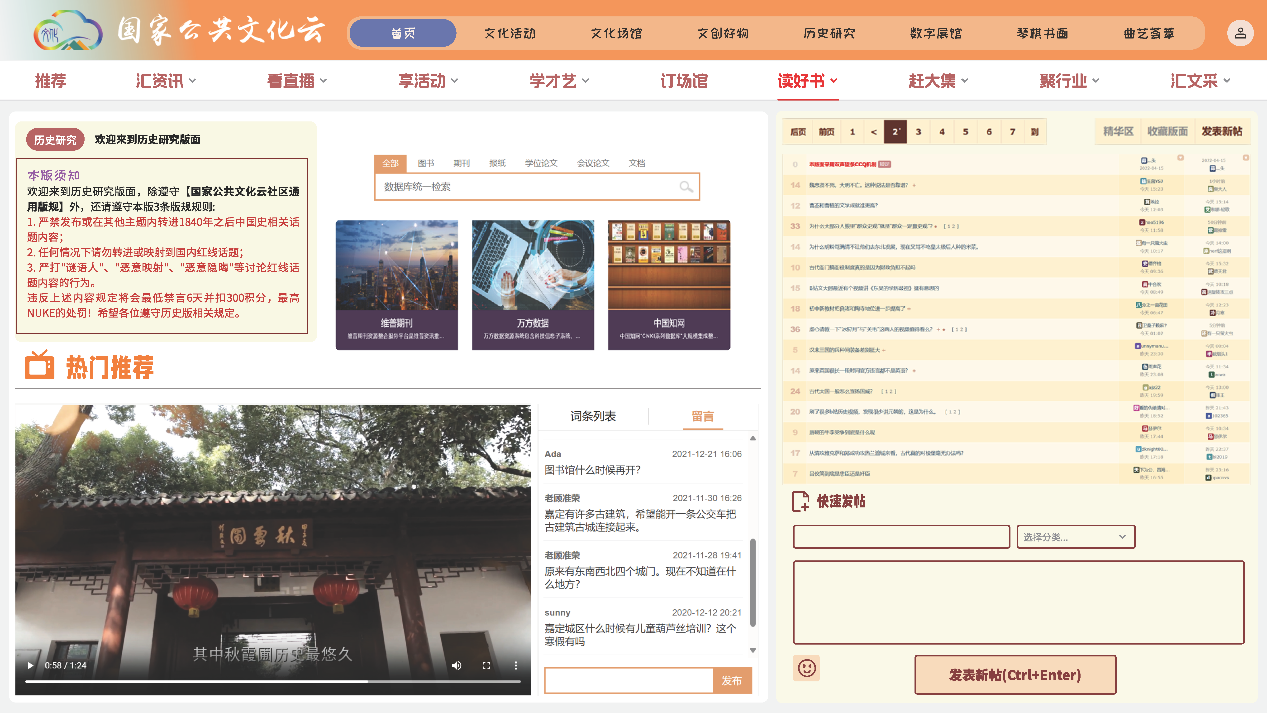


Fig.13 Cultural Communication Forum
