# Supplementary material
Source: Research Square preprint supplement (doi:10.21203/rs.3.rs-8356239/v1)
Supplement: Supplementary file 3 [file a9b75402994d0a472897c576.docx]

Table 8 Analysis of the mediation effect of Must-be - behavioral intention

| Path | Effect Size | Standard Error (SE) | 95% CI Lower Bound | 95% CI Upper Bound | P | Proportion Mediated | Statistical Significance |
| --- | --- | --- | --- | --- | --- | --- | --- |
| Must-be -Behavioral intention (Direct Causal Effect) | 0.149 | 0.060 | 0.031 | 0.265 | 0.016 | 62.9% | Significant |
| Must-be -CL- behavior intention | 0.018 | 0.013 | -0.002 | 0.048 | 0.075 | 7.6% | Non-Significant |
| Must-be -Usefulness - Behavioral intention | 0.019 | 0.013 | 0.001 | 0.056 | 0.033 | 8.0% | Significant |
| Must-be -Ease of use- Usefulness - Behavioral intention | 0.011 | 0.006 | 0.002 | 0.028 | 0.006 | 4.6% | Significant |
| Must-be - Ease of use -Attitude - Behavioral intention | 0.025 | 0.011 | 0.009 | 0.056 | 0.000 | 10.5% | Significant |
| Must-be - Usefulness - Attitude - Behavioral intention | 0.007 | 0.005 | 0.001 | 0.021 | 0.012 | 3.0% | Significant |
| Must-be -CL- Ease of use - Usefulness - Behavioral intention | 0.001 | 0.001 | 0.000 | 0.004 | 0.020 | 0.4% | Significant |
| Must-be -CL- Ease of use - Attitude - Behavioral intention | 0.003 | 0.002 | 0.001 | 0.009 | 0.001 | 1.3% | Significant |
| Must-be - Ease of use - Usefulness - Attitude - Behavioral intention | 0.003 | 0.002 | 0.001 | 0.008 | 0.003 | 1.3% | Significant |
| Must-be -CL- Ease of use - Usefulness - Attitude - Behavioral intention | 0.001 | 0.000 | 0.000 | 0.001 | 0.002 | 0.4% | Significant |
| Must-be - Behavioral intention (Total Causal Effect) | 0.236 | 0.056 | 0.122 | 0.340 | 0.001 |  | Significant |

Table 9 Analysis of the mediation effect of One-dimensional - behavioral intention

| Path | Effect Size | Standard Error (SE) | 95% CI Lower Bound | 95% CI Upper Bound | P | Proportion Mediated | Statistical Significance |
| --- | --- | --- | --- | --- | --- | --- | --- |
| One-dimensional- Behavioral intention (Direct Causal Effect) | 0.201 | 0.068 | 0.064 | 0.334 | 0.001 | 64.6% | Significant |
| One-dimensional -CL- Behavioral intention | 0.024 | 0.016 | -0.003 | 0.062 | 0.077 | 7.7% | Non-Significant |
| One-dimensional - Usefulness - Behavioral intention | 0.039 | 0.021 | 0.006 | 0.091 | 0.024 | 12.5% | Significant |
| One-dimensional - Ease of use - Usefulness - Behavioral intention | 0.007 | 0.005 | 0.002 | 0.022 | 0.006 | 2.3% | Significant |
| One-dimensional - Ease of use - Attitude - Behavioral intention | 0.017 | 0.009 | 0.004 | 0.040 | 0.003 | 5.5% | Significant |
| One-dimensional - Usefulness - Attitude - Behavioral intention | 0.015 | 0.007 | 0.005 | 0.035 | 0.000 | 4.8% | Significant |
| One-dimensional -CL - Ease of use - Usefulness - Behavioral intention | 0.001 | 0.001 | 0.000 | 0.005 | 0.019 | 0.3% | Significant |
| One-dimensional -CL - Ease of use - Attitude - Behavioral intention | 0.004 | 0.002 | 0.001 | 0.011 | 0.001 | 1.3% | Significant |
| One-dimensional - Ease of use - Usefulness - Attitude - Behavioral intention | 0.002 | 0.001 | 0.000 | 0.006 | 0.004 | 0.6% | Significant |
| One-dimensional -CL - Ease of use - Usefulness - Attitude - Behavioral intention | 0.001 | 0.000 | 0.000 | 0.002 | 0.002 | 0.3% | Significant |
| One-dimensional - Behavioral intention (Total Causal Effect) | 0.311 | 0.059 | 0.194 | 0.426 | 0.000 |  | Significant |

Table 10 Analysis of the mediation effect of Attractive - behavioral intention

| Path | Effect Size | Standard Error (SE) | 95% CI Lower Bound | 95% CI Upper Bound | P | Proportion Mediated | Statistical Significance |
| --- | --- | --- | --- | --- | --- | --- | --- |
| Attractive- Behavioral intention (Direct Causal Effect) | 0.140 | 0.063 | 0.010 | 0.260 | 0.036 | 60.6% | Significant |
| Attractive -CL - Behavioral intention |  |  |  |  |  |  | Non-Significant |
| Attractive - Usefulness - Behavioral intention | 0.032 | 0.019 | 0.004 | 0.079 | 0.026 | 13.9% | Significant |
| Attractive - Ease of use - Usefulness - Behavioral intention | 0.013 | 0.007 | 0.003 | 0.031 | 0.006 | 5.6% | Significant |
| Attractive - Ease of use - Attitude - Behavioral intention | 0.031 | 0.012 | 0.012 | 0.059 | 0.000 | 13.4% | Significant |
| Attractive - Usefulness - Attitude - Behavioral intention | 0.012 | 0.006 | 0.004 | 0.028 | 0.000 | 5.2% | Significant |
| Attractive -CL- Ease of use - Usefulness - Behavioral intention |  |  |  |  |  |  | Non-Significant |
| Attractive -CL- Ease of use - Attitude - Behavioral intention |  |  |  |  |  |  | Non-Significant |
| Attractive - Ease of use - Usefulness - Attitude - Behavioral intention | 0.003 | 0.002 | 0.001 | 0.009 | 0.003 | 1.3% | Significant |
| Attractive -CL- Ease of use - Usefulness - Attitude - Behavioral intention |  |  |  |  |  |  | Non-Significant |
| Attractive - Behavioral intention (Total Causal Effect) | 0.231 | 0.062 | 0.108 | 0.349 | 0.000 |  | Significant |
