# Supplementary material
Source: Research Square preprint supplement (doi:10.21203/rs.3.rs-8356239/v1)
Supplement: Supplementary file 4 [file d9258bce62f89aeca909ae93.docx]

Table 8 Descriptive statistics of demographic variables

| Variables | Options | Frequency | Proportion (%) |
| --- | --- | --- | --- |
| Gender | Male | 211 | 48.06 |
| Female | 228 | 51.94 |
| Age | Under 18 years old | 12 | 2.73 |
| 18~25 years old | 75 | 17.08 |
| 26~30 years old | 122 | 27.79 |
| 31~40 years old | 131 | 29.84 |
| 41~50 years old | 70 | 15.95 |
| 51~60 years old | 22 | 5.01 |
| Over 60 years old | 7 | 1.59 |
| Profession | Student | 77 | 17.54 |
| Production Worker | 45 | 10.25 |
| Sales Personnel | 36 | 8.2 |
| Marketing/PR Specialist | 28 | 6.38 |
| Customer Service Representative | 37 | 8.43 |
| Administrative/Logistics Staff | 33 | 7.52 |
| HR Professional | 21 | 4.78 |
| Finance/Auditing Specialist | 30 | 6.83 |
| Clerical Officer | 28 | 6.38 |
| R&D Technical Staff | 23 | 5.24 |
| Managerial Personnel | 22 | 5.01 |
| Educator | 19 | 4.33 |
| Consultant | 21 | 4.78 |
| Licensed Professional (such as Accountant, Lawyer, Architect, Healthcare Worker, Journalist, etc.) | 13 | 2.96 |
| Others | 6 | 1.37 |
| Educational background | Primary Education | 2 | 0.46 |
| Junior Secondary Education | 31 | 7.06 |
| Senior Secondary Education | 51 | 11.62 |
| Associate Degree | 111 | 25.28 |
| Bachelor’s Degree | 160 | 36.45 |
| Graduate Degree | 84 | 19.13 |
| Region | East China (Shandong, Jiangsu, Anhui, Zhejiang, Fujian, Jiangxi, Shanghai) | 71 | 16.17 |
| South China (Guangdong, Guangxi, Hainan) | 69 | 15.72 |
| Central China (Hubei, Hunan, Henan) | 58 | 13.21 |
| North China (Beijing, Tianjin, Hebei, Shanxi, Inner Mongolia) | 51 | 11.62 |
| Northwest China (Ningxia, Xinjiang, Qinghai, Shaanxi, Gansu) | 62 | 14.12 |
| Southwest China (Sichuan, Yunnan, Guizhou, Tibet, Chongqing) | 60 | 13.67 |
| Northeast China (Liaoning, Jilin, Heilongjiang) | 57 | 12.98 |
| Hong Kong, Macao and Taiwan | 11 | 2.51 |
| Have you ever used the National Public Cultural Cloud Platform? | Never Used | 13 | 2.96 |
| Used Infrequently | 115 | 26.20 |
| Occasionally Used | 222 | 50.57 |
| Regularly Used | 89 | 20.27 |
| How familiar are you with "Gamification"? | Not aware at all | 6 | 1.37 |
| Slightly aware | 129 | 29.38 |
| Moderately aware | 209 | 47.61 |
| Very aware | 95 | 21.64 |
